# Supplementary material for: Adsorption mechanism of aqueous Cr(vi) by Vietnamese corncob biochar: a spectroscopic study
Source: PubMed Central journal article supplement — RSC Adv. 2024 Dec 11;14(53):39205–18. doi: 10.1039/d4ra07455f (PMC11632952; doi:10.1039/d4ra07455f), 2024-12-11
Supplement: RA-014-D4RA07455F-s001.pdf [file RA-014-D4RA07455F-s001.pdf]

1 **Supporting information for**

2  
3 **Adsorption mechanism of aqueous Cr(VI) by Vietnamese corncob biochar:**  
4 **a spectroscopic study**

5  
6 Duy-Khoi Nguyen<sup>1</sup>, Quoc-Bao Ly-Tran<sup>1</sup>, Van-Phuc Dinh<sup>1,\*</sup>, Bich-Ngoc Duong<sup>1</sup>, Thi-Phuong Tu  
7 Nguyen<sup>1</sup>, Pham Nguyen Kim Tuyen<sup>2</sup>.

8  
9 <sup>a</sup>Institute of Interdisciplinary Social Sciences, Nguyen Tat Thanh University, Ho Chi Minh City,  
10 700000, Viet Nam.

11 <sup>b</sup>Faculty of Environment, Sai Gon University, Ho Chi Minh City 700000, Vietnam.

12  
13 Corresponding authors: [dvphuc@ntt.edu.vn](mailto:dvphuc@ntt.edu.vn)

### 15 ***Preparation of calibration curves and Cr(VI) stock solution***

16 For the preparation of calibration curve, Cr(VI) solutions with concentrations of 0.5, 1.0, 2.0, 3.0,  
17 4.0, and 5.0 mg/L were prepared from a 1000 mg/L standard Cr(VI) solution (Sigma) and diluted  
18 with 0.5M HNO<sub>3</sub>. Subsequently, a linear standard curve was generated using an AAS ZA3300  
19 instrument, resulting in a correlation coefficient ( $R^2 =$  of 0.996). For the adsorption experiments,  
20 the desired concentration of the Cr(VI) stock solution was prepared by diluting it from the 1000  
21 mg/L standard Cr(VI) solution in deionized water and adjusting the pH using 0.1-0.5M HNO<sub>3</sub> and  
22 0.1-0.5M NaOH.

### 23 ***Investigation of factors influencing the adsorption process***

24 ***Effect of pH:*** The pH of the Cr(VI) adsorption process was investigated at values of 2.0-11.0.  
25 Specifically, 50 mL of a Cr(VI) solution with a concentration of 85 mg/L was introduced into 100  
26 mL glass containers, each containing 0.1 g of CCBC, at the specified pH values for adsorption.  
27 The adsorption process was carried out using a magnetic stirrer (RSM-03-10K, Germany) with a  
28 stirring speed of 250 rpm at 34 °C and  $t = 180$  mins. After adsorption, the biochar was separated  
29 from the solution using centrifugation (6000 rpm for 30 minutes). The Cr(VI) concentration before  
30 and after adsorption was analyzed using a AAS (ZA3300, Hitachi, Japan).

31 ***Effect of contact time:*** Adsorption time was investigated in the range of 5 to 270 mins at pH =  
32 2.0,  $T = 34$  °C, Cr(VI) concentration of 85 mg/L ( $V = 50$  mL),  $m_{\text{biochar}} = 0.1$  g. The adsorption  
33 process and Cr(VI) concentration analysis were conducted in a manner similar to the previously  
34 described procedure.

35 ***Effect of initial Cr(VI) concentration:*** Various Cr(VI) concentrations were investigated  
36 sequentially: 25, 50, 75, 100, 125, 150, 175, 200, and 225 mg/L to calculate isotherm adsorption  
37 models. The adsorption process was carried out with 50 mL of Cr(VI) solution at pH = 2.0,  $t = 180$   
38 mins,  $m_{\text{biochar}} = 0.1$  g at 34 °C, 44 °C, and 54 °C respectively.

39 ***Effect of adsorbent dosage and ionic strength:*** The influence of adsorbent dosage and ionic  
40 strength was studied under the following conditions: pH = 2.0,  $t = 180$  mins,  $T = 34$  °C, with a  
41 volume of 50 mL and a Cr(VI) concentration of 85 mg/L. Adsorbent dosage ranged from 0.05 to  
42 0.15 g (0.05; 0.075; 0.1; 0.125; 0.15), and ion strength was varied from 0.0 to  $18.63 \times 10^3$  mg/L of  
43 KCl (0.0; 3.72; 7.45; 11.18; 14.91;  $18.63 \times 10^3$ ).

44

45 **ANOVA Analysis for effect of pH**

| pH | Count | Sum    | Average | Variance |
|----|-------|--------|---------|----------|
| 2  | 3     | 172.38 | 57.46   | 7.74     |
| 3  | 3     | 123.71 | 41.24   | 47.11    |
| 4  | 3     | 96.88  | 32.29   | 5.43     |
| 5  | 3     | 78.64  | 26.21   | 2.51     |
| 6  | 3     | 63.56  | 21.19   | 1.75     |
| 7  | 3     | 51.85  | 17.28   | 3.52     |
| 8  | 3     | 28.67  | 9.56    | 40.57    |
| 9  | 3     | 31.46  | 10.49   | 1.15     |
| 10 | 3     | 45.62  | 15.21   | 6.58     |
| 11 | 3     | 34.87  | 11.62   | 9.70     |

**ANOVA**

| Source of Variation | SS      | df | MS     | F     | P-value  | F crit |
|---------------------|---------|----|--------|-------|----------|--------|
| Between Groups      | 6493.37 | 9  | 721.49 | 57.23 | 2.58E-12 | 2.39   |
| Within Groups       | 252.13  | 20 | 12.61  |       |          |        |
| Total               | 6745.50 | 29 |        |       |          |        |

46

47 **ANOVA Analysis for effect of Sorbent dosage**

| Sorbent dosage (g) | Count | Sum    | Average | Variance |
|--------------------|-------|--------|---------|----------|
| 0.05               | 3     | 76,68  | 25,56   | 0,12     |
| 0.075              | 3     | 113,88 | 37,96   | 0,26     |
| 0.1                | 3     | 149,15 | 49,72   | 0,41     |
| 0.125              | 3     | 178,79 | 59,60   | 0,18     |
| 0.15               | 3     | 206,73 | 68,91   | 0,03     |

**ANOVA**

| Source of Variation | SS      | df | MS     | F       | P-value  | F crit |
|---------------------|---------|----|--------|---------|----------|--------|
| Between Groups      | 3535,22 | 4  | 883,80 | 4423,59 | 3,45E-16 | 3,48   |
| Within Groups       | 2,00    | 10 | 0,20   |         |          |        |
| Total               | 3537,21 | 14 |        |         |          |        |

48

49 **ANOVA Analysis for effect of Ionic strength**

| <i>Ionic strength</i> | <i>Count</i> | <i>Sum</i> | <i>Average</i> | <i>Variance</i> |
|-----------------------|--------------|------------|----------------|-----------------|
| 0.05                  | 3            | 161,68     | 53,89          | 0,73            |
| 0.1                   | 3            | 157,80     | 52,60          | 19,21           |
| 0.15                  | 3            | 149,58     | 49,86          | 8,77            |
| 0.2                   | 3            | 140,17     | 46,72          | 44,82           |
| 0.3                   | 3            | 131,99     | 44,00          | 149,41          |

**ANOVA**

| <i>Source of Variation</i> | <i>SS</i>     | <i>df</i> | <i>MS</i> | <i>F</i> | <i>P-value</i> | <i>F crit</i> |
|----------------------------|---------------|-----------|-----------|----------|----------------|---------------|
| Between Groups             | 200,99        | 4         | 50,25     | 1,13     | 0,40           | 3,48          |
| Within Groups              | 445,86        | 10        | 44,59     |          |                |               |
| <b>Total</b>               | <b>646,85</b> | <b>14</b> |           |          |                |               |

50 **ANOVA Analysis for effect of adsorption time**

| <i>Time</i> | <i>Count</i> | <i>Sum</i> | <i>Average</i> | <i>Variance</i> |
|-------------|--------------|------------|----------------|-----------------|
| 5           | 3            | 46.03      | 15.34          | 0.29            |
| 10          | 3            | 52.11      | 17.37          | 0.39            |
| 15          | 3            | 55.37      | 18.46          | 0.24            |
| 20          | 3            | 58.62      | 19.54          | 0.08            |
| 30          | 3            | 61.54      | 20.51          | 0.06            |
| 40          | 3            | 63.91      | 21.30          | 0.03            |
| 60          | 3            | 64.8       | 21.60          | 0.00            |
| 80          | 3            | 65.6       | 21.87          | 0.23            |
| 100         | 3            | 67.29      | 22.43          | 0.16            |
| 120         | 3            | 67.9       | 22.63          | 0.15            |
| 150         | 3            | 70.77      | 23.59          | 0.13            |
| 180         | 3            | 72.51      | 24.17          | 0.05            |
| 210         | 3            | 72.14      | 24.05          | 0.10            |
| 240         | 3            | 72.4       | 24.13          | 0.03            |
| 270         | 3            | 72.05      | 24.02          | 0.05            |

**ANOVA**

| <i>Source of Variation</i> | <i>SS</i>     | <i>df</i> | <i>MS</i> | <i>F</i> | <i>P-value</i> | <i>F crit</i> |
|----------------------------|---------------|-----------|-----------|----------|----------------|---------------|
| Between Groups             | 307.42        | 14        | 21.96     | 166.31   | 1.87E-24       | 2.04          |
| Within Groups              | 3.96          | 30        | 0.13      |          |                |               |
| <b>Total</b>               | <b>311.38</b> | <b>44</b> |           |          |                |               |

Table S1. Non-linear isotherm and kinetic models used in this study

|                         | Types of models         | Non-linear form                                                          | Parameters                                                                                      |
|-------------------------|-------------------------|--------------------------------------------------------------------------|-------------------------------------------------------------------------------------------------|
| Isotherm models (307 K) | Langmuir                | $Q_e = \frac{Q_m \cdot K_L \cdot C_e}{1 + K_L \cdot C_e}$                | $K_L$ (L.mg <sup>-1</sup> )<br>$Q_m$ (mg.g <sup>-1</sup> )                                      |
|                         | Freundlich              | $Q_e = K_F \cdot C_e^{1/n}$                                              | $n$<br>$K_F$ ((mg.g <sup>-1</sup> ).(L.mg <sup>-1</sup> ) <sup>1/n</sup> )                      |
|                         | Sips                    | $Q_e = \frac{Q_s \cdot C_e^{\beta_s}}{1 + \alpha_s \cdot C_e^{\beta_s}}$ | $Q_s$ (L.g <sup>-1</sup> )<br>$\alpha_s$ (L.mg <sup>-1</sup> )<br>$\beta_s$                     |
|                         | Redlich-Peterson        | $Q_e = \frac{A_{RP} \cdot C_e}{1 + K_{RP} \cdot C_e^{\beta_s}}$          | $A_{RP}$ (mg g <sup>-1</sup> min <sup>-1</sup> )<br>$K_{RP}$ (mg.g <sup>-1</sup> )<br>$\beta_s$ |
| Kinetic models          | Pseudo-first-order      | $Q_t = Q_e \cdot (1 - e^{-k_1 t})$                                       | $q_{e \text{ (cal)}}$ (mg.g <sup>-1</sup> )<br>$k_1$ (min <sup>-1</sup> )                       |
|                         | Pseudo-second-order     | $Q_t = \frac{Q_e^2 \cdot k_2 \cdot t}{1 + k_2 \cdot Q_e \cdot t}$        | $q_{e \text{ (cal)}}$ (mg.g <sup>-1</sup> )<br>$k_2$ (g.mg <sup>-1</sup> .min <sup>-1</sup> )   |
|                         | Intraparticle diffusion | $Q_t = K_p \cdot t^{1/2} + C$                                            | $K_p$<br>$C$                                                                                    |
|                         | Elovic                  | $Q_t = \frac{1}{\beta} \cdot \ln(1 + \alpha \beta t)$                    | $\alpha$ (mg g <sup>-1</sup> min <sup>-1</sup> )<br>$\beta$ (mg.g <sup>-1</sup> )               |

53

54

55

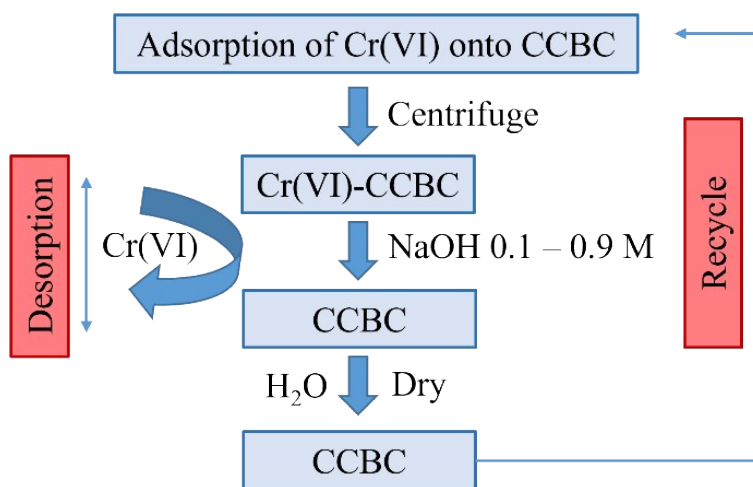

57

58

**Scheme S1.** Desorption and reusable of corn cob biochar

59

60

61

62

63

64

65

66

67

68

69

**Table S2.** Efficiency of converting corn cob biomass to biochar

| <b>Sample</b> | <b>Weight of biomass (g)</b> | <b>Weight of product (g)</b> | <b>Yield of conversion (%)</b> |
|---------------|------------------------------|------------------------------|--------------------------------|
| CCBC-500-15   | 10.01                        | 2.62                         | 26.21                          |
| CCBC-500-30   | 10.06                        | 2.48                         | 24.70                          |
| CCBC-500-45   | 10.03                        | 2.45                         | 24.44                          |
| CCBC-600-15   | 10.00                        | 2.27                         | 22.78                          |
| CCBC-600-30   | 10.08                        | 2.24                         | 22.29                          |
| CCBC-600-45   | 10.03                        | 2.21                         | 22.06                          |
| CCBC-700-15   | 10.05                        | 2.20                         | 21.96                          |
| CCBC-700-30   | 10.00                        | 2.11                         | 21.16                          |
| CCBC-700-45   | 10.04                        | 2.02                         | 20.14                          |

$$\text{Yield} = [(m_{\text{biochar}} / m_{\text{biomass}}) \times 100\%] [1]$$

**Table S3.** The porosity of biochar samples synthesized from raw corn cob

| Materials                   | Pyrolysis condition (°C) | S <sub>sa</sub> <sup>a</sup> (m <sup>2</sup> /g) | S <sub>micro</sub> (m <sup>2</sup> /g) | S <sub>ext</sub> <sup>b</sup> (m <sup>2</sup> /g) | Pore volume (cm <sup>3</sup> /g) | Refs                       |
|-----------------------------|--------------------------|--------------------------------------------------|----------------------------------------|---------------------------------------------------|----------------------------------|----------------------------|
| Corn cob biochar            | 500                      | 6.7                                              | 3.8                                    | 2.9                                               | 0.002                            | <a href="#">This study</a> |
| Corn cob biochar            | 600                      | 262                                              | 245                                    | 17                                                | 0.113                            | <a href="#">This study</a> |
| Corn cob biochar            | 700                      | 443                                              | 416                                    | 27                                                | 0.194                            | <a href="#">This study</a> |
| Corn cob activated carbon   | 500                      | 25.3                                             | 21.7                                   | 3.6                                               | -                                | [2]                        |
| Corn cob activated carbon   | 600                      | 30.9                                             | -                                      | -                                                 | 0.011                            | [3]                        |
| Cassava Stems biochar       | 700                      | 200.5                                            | -                                      | -                                                 | 0.122                            | [4]                        |
| Sugarcane bagasse biochar   | 800                      | 60                                               | -                                      | -                                                 | 0.090                            | [5]                        |
| Spent coffee ground biochar | 500                      | 11                                               | -                                      | -                                                 | 0.010                            | [6]                        |
| Pomelo fruit peel biochar   | 500                      | 40.6                                             | -                                      | -                                                 | -                                | [7]                        |

75

76

<sup>a</sup>Calculated with the BET model. <sup>b</sup>Determined by the t-plot method,  $S_{ext} = S_{sa} - S_{micro}$ . S<sub>sa</sub> = Specific surface area.



78  
79  
80

**Table S4.** Percentage removal of Cr(VI) from water on CCBC samples synthesized under different pyrolysis conditions.

| <b>Pyr. condition<br/>(°C, mins)</b> | <b>Biochar<br/>(g)</b> | <b>Ads. time<br/>(mins)</b> | <b>Ads. temp.<br/>(°C)</b> | <b>%<br/>Removal</b> |
|--------------------------------------|------------------------|-----------------------------|----------------------------|----------------------|
| 700, 15                              | 0.1                    | 180                         | 34                         | 57.6 ± 2.1           |
| 600, 15                              |                        |                             |                            | 42.5 ± 2.3           |
| 500, 15                              |                        |                             |                            | 31.3 ± 2.4           |
| 700, 30                              | 0.1                    | 180                         | 34                         | 56.5 ± 2.0           |
| 600, 30                              | 0.1                    | 180                         | 34                         | 43.1 ± 2.2           |
| 500, 30                              | 0.1                    | 180                         | 34                         | 32.5 ± 2.2           |
| 700, 45                              | 0.1                    | 180                         | 34                         | 55.3 ± 2.0           |
| 600, 45                              | 0.1                    | 180                         | 34                         | 43.7 ± 1.9           |
| 500, 45                              | 0.1                    | 180                         | 34                         | 32.9 ± 2.0           |

81  
82

Pyr. = pyrolysis; Ssa = Specific surface area; Temp. = temperature; Ads. = adsorption.

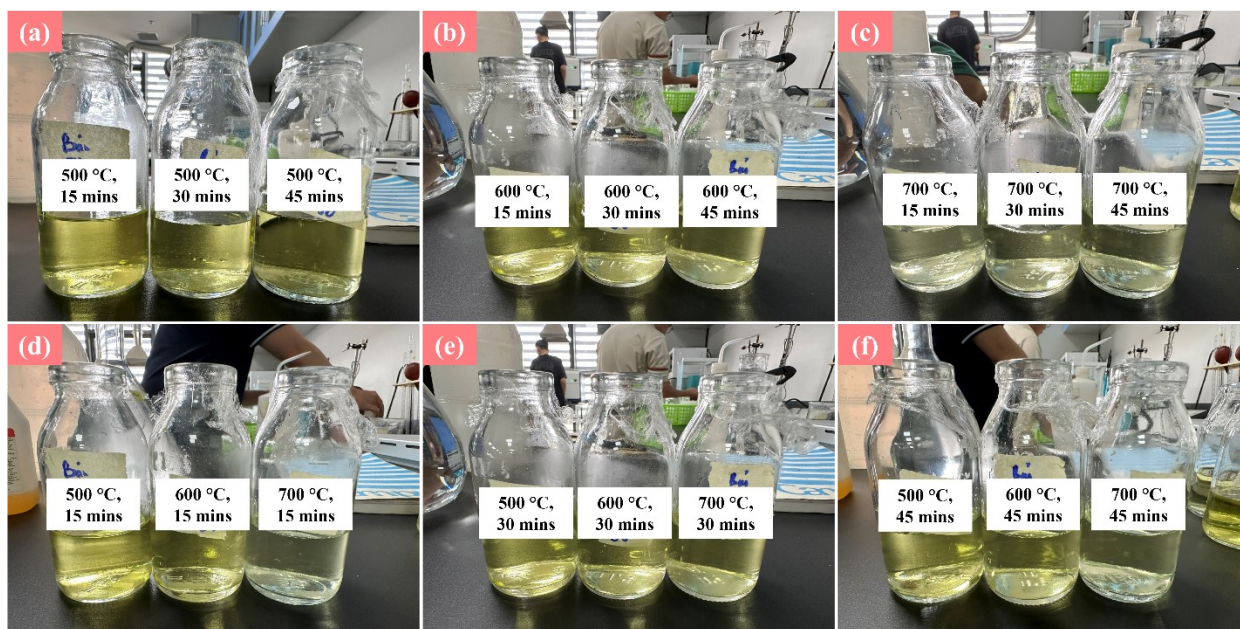

84

85

86

87

**Fig. S1.** The solution after Cr(VI) adsorption onto CCBC synthesized at different pyrolysis condition ( $C_0 = 85$  mg/L, pH = 2.0, T = 34 °C, t = 180 mins).

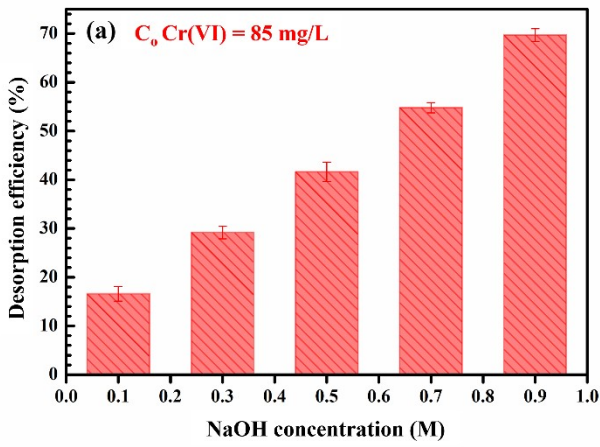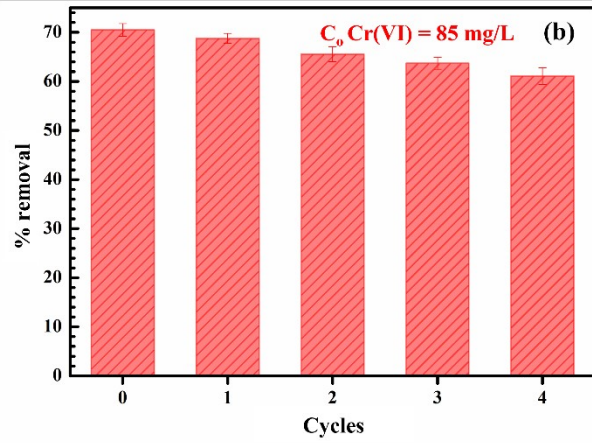

89

90

91

92

93

**Fig. S2.** The desorption efficiency (a) and recycle numbers (b) of CCBC for Cr(VI) removal from aqueous solution

**Table S5.** The parameters of non-linear isotherm models at 34 °C

| Types of models         | Parameters                                                          | 34 °C |
|-------------------------|---------------------------------------------------------------------|-------|
| <b>Langmuir</b>         | $K_L$ (L.mg <sup>-1</sup> )                                         | 0.06  |
|                         | $q_m$ (mg.g <sup>-1</sup> )                                         | 38.13 |
|                         | RMSE                                                                | 2.25  |
|                         | $R^2$                                                               | 0.93  |
|                         | $\chi^2$                                                            | 2.72  |
| <b>Freundlich</b>       | n                                                                   | 3.30  |
|                         | $K_F$ ((mg.g <sup>-1</sup> ).(L.mg <sup>-1</sup> ) <sup>1/n</sup> ) | 8.04  |
|                         | RMSE                                                                | 1.23  |
|                         | $R^2$                                                               | 0.98  |
|                         | $\chi^2$                                                            | 0.43  |
| <b>Sips</b>             | $Q_S$ (L.g <sup>-1</sup> )                                          | 6.98  |
|                         | $\alpha_s$ (L.mg <sup>-1</sup> )                                    | 0.09  |
|                         | $\beta_s$                                                           | 0.46  |
|                         | RMSE                                                                | 1.06  |
|                         | $R^2$                                                               | 0.98  |
|                         | $\chi^2$                                                            | 0.33  |
| <b>Redlich-Peterson</b> | $K_{RP}$ (L.g <sup>-1</sup> )                                       | 0.73  |
|                         | $A_{RP}$ (L.mg <sup>-1</sup> )                                      | 0.43  |
|                         | g                                                                   | 16.28 |
|                         | RMSE                                                                | 6.96  |
|                         | $R^2$                                                               | 0.33  |
|                         | $\chi^2$                                                            | 21.39 |

98

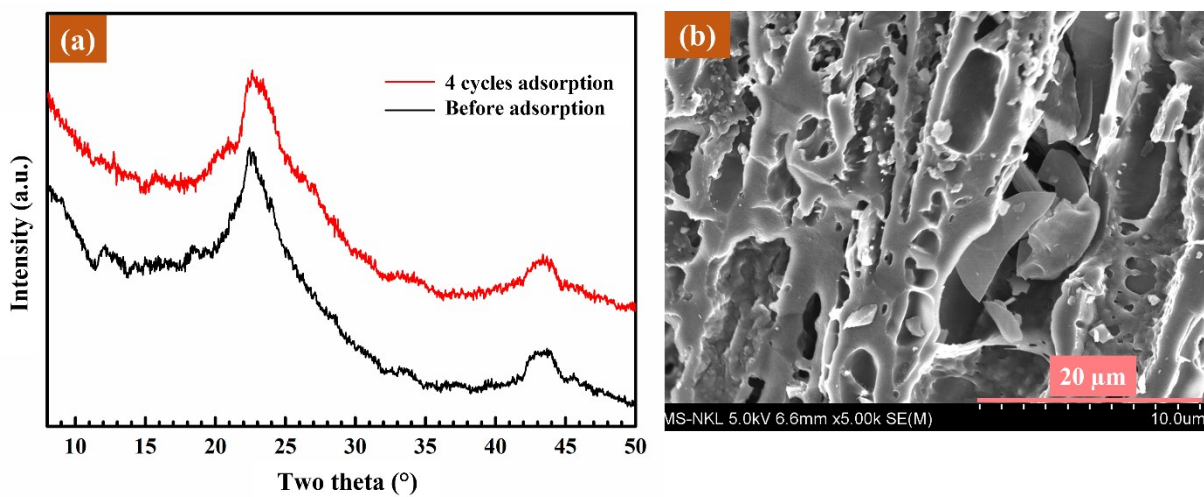

99

100 **Fig. S3.** XRD pattern (a); and SEM image (b) of CCBC before 4<sup>th</sup> cycles of Cr(VI) adsorption.

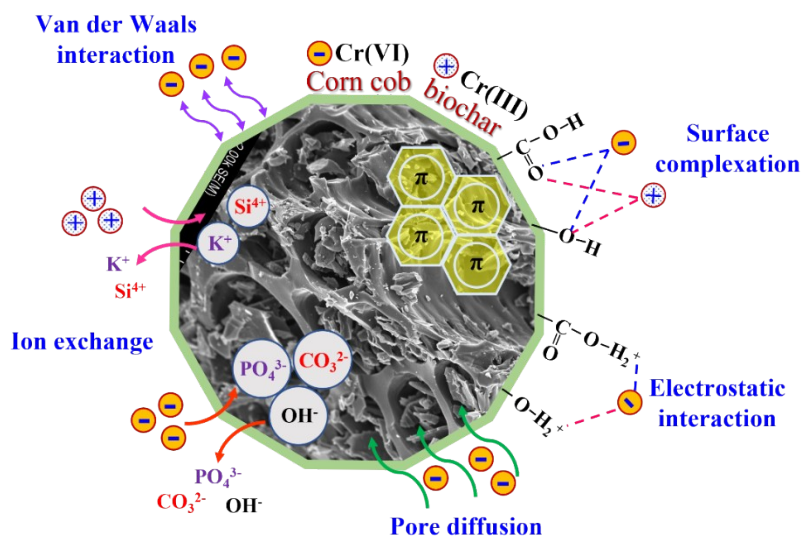

102

103

**Fig. S4.** Possible interaction mechanism between Cr(VI) and CCBC

- 106 [1] Y.-n. Liu, Z.-h. Guo, Y. Sun, W. Shi, Z.-y. Han, X.-y. Xiao, P. Zeng, Stabilization of heavy  
107 metals in biochar pyrolyzed from phytoremediated giant reed (*Arundo donax*) biomass,  
108 *Transactions of Nonferrous Metals Society of China*, 27 (2017) 656-665.
- 109 [2] H. Li, P. Gao, J. Cui, F. Zhang, F. Wang, J. Cheng, Preparation and Cr(VI) removal  
110 performance of corncob activated carbon, *Environmental Science and Pollution Research*, 25  
111 (2018) 20743-20755.
- 112 [3] G.K. Gupta, M. Ram, R. Bala, M. Kapur, M.K. Mondal, Pyrolysis of chemically treated  
113 corncob for biochar production and its application in Cr(VI) removal, *Environmental Progress &*  
114 *Sustainable Energy*, 37 (2018) 1606-1617.
- 115 [4] S. Wijitkosum, T. Sriburi, Applying Cassava Stems Biochar Produced from Agronomical  
116 Waste to Enhance the Yield and Productivity of Maize in Unfertile Soil, *Fermentation*, 7 (2021)  
117 277.
- 118 [5] K. Saini, B. Biswas, A. Kumar, A. Sahoo, J. Kumar, T. Bhaskar, Screening of sugarcane  
119 bagasse-derived biochar for phenol adsorption: optimization study using response surface  
120 methodology, *International Journal of Environmental Science and Technology*, 19 (2022) 8797-  
121 8810.
- 122 [6] J. Shin, S.-H. Lee, S. Kim, D. Ochir, Y. Park, J. Kim, Y.-G. Lee, K. Chon, Effects of  
123 physicochemical properties of biochar derived from spent coffee grounds and commercial  
124 activated carbon on adsorption behavior and mechanisms of strontium ions ( $\text{Sr}^{2+}$ ), *Environmental*  
125 *Science and Pollution Research*, 28 (2021) 40623-40632.
- 126 [7] V.-P. Dinh, D.-K. Nguyen, T.-T. Luu, Q.-H. Nguyen, L.A. Tuyen, D.D. Phong, H.A.T. Kiet,  
127 T.-H. Ho, T.T.P. Nguyen, T.D. Xuan, P.T. Hue, N.T.N. Hue, Adsorption of Pb(II) from aqueous  
128 solution by pomelo fruit peel-derived biochar, *Materials Chemistry and Physics*, 285 (2022)  
129 126105.
